# Supplementary material for: Lower risk of smoking-related cancer in individuals with familial hypercholesterolemia compared with controls: a prospective matched cohort study
Source: PubMed Central journal article supplement (PMC6917694; doi:10.1038/s41598-019-55682-x), 2019-12-17
Supplement: 41598_2019_55682_MOESM1_ESM.pdf [file 41598_2019_55682_MOESM1_ESM.pdf]

**Lower risk of smoking-related cancer in individuals with familial hypercholesterolemia compared with controls: a prospective matched cohort study.**

Henriette W. Krogh, Msc<sup>1\*</sup>, Karianne Svendsen, PhD<sup>1,2\*</sup>, Jannicke Igland, PhD<sup>3</sup>, Liv J. Mundal, MD, MHA, PhD<sup>1,2</sup>, Kirsten B. Holven, PhD<sup>1,4</sup>, Martin P. Bogsrud, MD, PhD<sup>4,5</sup>, Trond P. Leren, MD<sup>5</sup>, Kjetil Retterstøl, MD, PhD<sup>1,2</sup>

\*Contributed equally, and are both corresponding authors.

<sup>1</sup>Department of Nutrition, Institute of Basic Medical Sciences, University of Oslo, Norway.

<sup>2</sup>The Lipid Clinic, Department of Endocrinology, Morbid Obesity and Preventive Medicine, Oslo University Hospital, Norway.

<sup>3</sup>Department of Global Public Health and Primary Care, University of Bergen, Norway.

<sup>4</sup>National Advisory Unit on Familial Hypercholesterolemia, Department of Endocrinology, Morbid Obesity and Preventive Medicine, Oslo University Hospital, Norway.

<sup>5</sup>Unit for Cardiac and Cardiovascular Genetics, Oslo University Hospital, Norway.

**Supplementary table 1:** Cases of cancer related to poor diet and hazard ratios for the FH population compared with the control population, with stratification on age at baseline.

|                               | Total study population |                  | Women |                  | Men   |                  |
|-------------------------------|------------------------|------------------|-------|------------------|-------|------------------|
|                               | Cases                  | HR (95% CI)*     | Cases | HR (95% CI)*     | Cases | HR (95% CI)*     |
| <b>Total study population</b> |                        |                  |       |                  |       |                  |
| Control                       | 801                    | 1                | 434   | 1                | 367   | 1                |
| FH                            | 36                     | 0.82 (0.60-1.15) | 14    | 0.59 (0.35-1.01) | 22    | 1.10 (0.71-1.69) |
| <b>Age 0-39</b>               |                        |                  |       |                  |       |                  |
| Control                       | 101                    | 1                | 54    | 1                | 47    | 1                |
| FH                            | 4                      | 0.79 (0.30-2.14) | 0     | -                | 4     | 1.72 (0.62-4.78) |
| <b>Age 40-69</b>              |                        |                  |       |                  |       |                  |
| Control                       | 577                    | 1                | 299   | 1                | 278   | 1                |
| FH                            | 25                     | 0.82 (0.55-1.22) | 10    | 0.64 (0.34-1.20) | 15    | 1.01 (0.60-1.70) |
| <b>Age 70+</b>                |                        |                  |       |                  |       |                  |
| Control                       | 123                    | 1                | 81    | 1                | 42    | 1                |
| FH                            | 7                      | 0.88 (0.41-1.89) | 4     | 0.78 (0.28-2.14) | 3     | 1.06 (0.33-3.44) |

\*HR from Cox proportional hazards regression stratified on matched caseset

FH, familial hypercholesterolemia; HR, hazard ratio; CI, confidence interval.

**Supplementary table 2:** Cases of cancer related to physical inactivity and hazard ratios for the FH population compared with the control population, with stratification on age at baseline.

|                               | Total study population |                  | Women |                  | Men   |                  |
|-------------------------------|------------------------|------------------|-------|------------------|-------|------------------|
|                               | Cases                  | HR (95% CI)*     | Cases | HR (95% CI)*     | Cases | HR (95% CI)*     |
| <b>Total study population</b> |                        |                  |       |                  |       |                  |
| Control                       | 1455                   | 1                | 1231  | 1                | 224   | 1                |
| FH                            | 72                     | 0.93 (0.73-1.18) | 61    | 0.94 (0.72-1.21) | 11    | 0.89 (0.48-1.63) |
| <b>Age 0-39</b>               |                        |                  |       |                  |       |                  |
| Control                       | 266                    | 1                | 243   | 1                | 23    | 1                |
| FH                            | 14                     | 1.05 (0.61-1.80) | 13    | 1.06 (0.61-1.85) | 1     | 0.89 (0.12-6.62) |
| <b>Age 40-69</b>              |                        |                  |       |                  |       |                  |
| Control                       | 1034                   | 1                | 867   | 1                | 167   | 1                |
| FH                            | 53                     | 0.97 (0.74-1.28) | 43    | 0.95 (0.70-1.29) | 10    | 1.10 (0.58-2.09) |
| <b>Age 70+</b>                |                        |                  |       |                  |       |                  |
| Control                       | 155                    | 1                | 121   | 1                | 34    | 1                |
| FH                            | 5                      | 0.51 (0.21-1.26) | 5     | 0.66 (0.27-1.64) | 0     | -                |

\*HR from Cox proportional hazards regression stratified on matched caseset

FH, familial hypercholesterolemia; HR, hazard ratio; CI, confidence interval.

**Supplementary table 3:** Cases of alcohol-related cancer and hazard ratios for the FH population compared with the control population, with stratification on age at baseline.

|                               | Total study population |                  | Women |                  | Men   |                  |
|-------------------------------|------------------------|------------------|-------|------------------|-------|------------------|
|                               | Cases                  | HR (95% CI)*     | Cases | HR (95% CI)*     | Cases | HR (95% CI)*     |
| <b>Total study population</b> |                        |                  |       |                  |       |                  |
| Control                       | 1718                   | 1                | 1239  | 1                | 479   | 1                |
| FH                            | 90                     | 0.98 (0.80-1.22) | 58    | 0.89 (0.68-1.16) | 32    | 1.23 (0.86-1.76) |
| <b>Age 0-39</b>               |                        |                  |       |                  |       |                  |
| Control                       | 295                    | 1                | 239   | 1                | 56    | 1                |
| FH                            | 18                     | 1.22 (0.76-1.96) | 13    | 1.09 (0.62-1.90) | 5     | 1.78 (0.71-4.44) |
| <b>Age 40-69</b>              |                        |                  |       |                  |       |                  |
| Control                       | 1249                   | 1                | 873   | 1                | 376   | 1                |
| FH                            | 60                     | 0.91 (0.70-1.18) | 39    | 0.85 (0.62-1.17) | 21    | 1.04 (0.67-1.62) |
| <b>Age 70+</b>                |                        |                  |       |                  |       |                  |
| Control                       | 174                    | 1                | 127   | 1                | 47    | 1                |
| FH                            | 12                     | 1.13 (0.62-2.03) | 6     | 0.79 (0.35-1.80) | 6     | 1.95 (0.83-4.59) |

\*HR from Cox proportional hazards regression stratified on matched caseset

FH, familial hypercholesterolemia; HR, hazard ratio; CI, confidence interval.

**Supplementary table 4:** Cases of cancer related to body fatness and weight gain and hazard ratios for the FH population compared with the control population, with stratification on age at baseline.

|                               | Total study population |                  | Women |                  | Men   |                  |
|-------------------------------|------------------------|------------------|-------|------------------|-------|------------------|
|                               | Cases                  | HR (95% CI)*     | Cases | HR (95% CI)*     | Cases | HR (95% CI)*     |
| <b>Total study population</b> |                        |                  |       |                  |       |                  |
| Control                       | 3131                   | 1                | 1650  | 1                | 1481  | 1                |
| FH                            | 172                    | 1.03 (0.89-1.21) | 83    | 0.95 (0.76-1.19) | 89    | 1.13 (0.91-1.40) |
| <b>Age 0-39</b>               |                        |                  |       |                  |       |                  |
| Control                       | 400                    | 1                | 301   | 1                | 99    | 1                |
| FH                            | 21                     | 1.06 (0.68-1.64) | 13    | 0.87 (0.50-1.51) | 8     | 1.64 (0.80-3.38) |
| <b>Age 40-69</b>              |                        |                  |       |                  |       |                  |
| Control                       | 2395                   | 1                | 1174  | 1                | 1221  | 1                |
| FH                            | 131                    | 1.04 (0.87-1.24) | 63    | 1.02 (0.79-1.32) | 68    | 1.05 (0.82-1.35) |
| <b>Age 70+</b>                |                        |                  |       |                  |       |                  |
| Control                       | 336                    | 1                | 175   | 1                | 161   | 1                |
| FH                            | 20                     | 0.99 (0.63-1.56) | 7     | 0.66 (0.31-1.41) | 13    | 1.36 (0.77-2.41) |

\*HR from Cox proportional hazards regression stratified on matched caseset

FH, familial hypercholesterolemia; HR, hazard ratio; CI, confidence interval.
